# Supplementary material for: Craniofacial ontogeny in Tylosaurinae
Source: PeerJ journal article supplement (doi:10.7717/peerj.10145), 2020-10-20
Supplement: Supplemental_Figure_S2.pdf [file Supplemental_Figure_S2.pdf]

**Character number 4, premaxilla premental rostrum shape, lateral view.** (A) State 0, acute (*T. proriger* AMNH FARB 4909). (B) State 1, rounded and, in *Tylosaurus*, distinct knob present (*T. proriger* FMNH P15144). Note: the photograph of FMNH P15144 is inverted to face left.

**A**

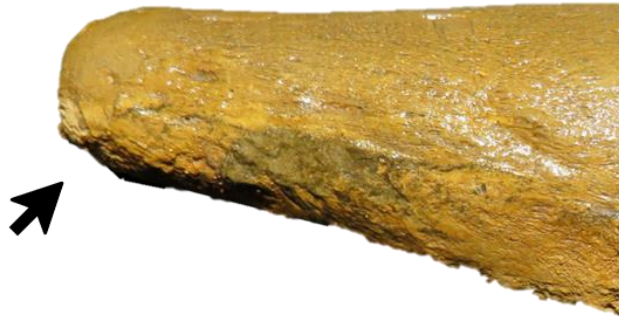

**B**

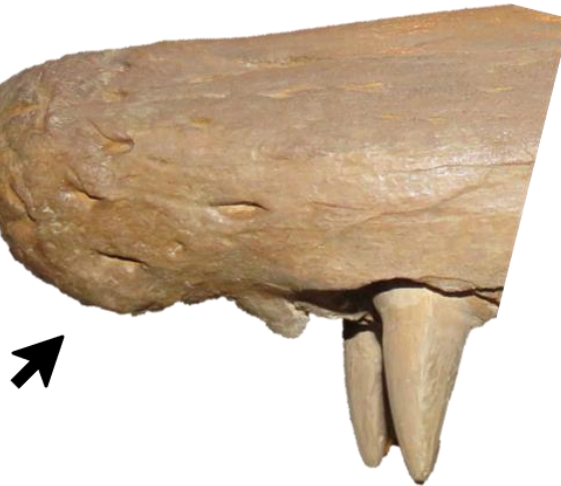

**Examples of character number 5, premaxilla predental rostrum foramina size.** State 0, large (A, *T. proriger* FHSM VP-2160; D, FHSM VP-14840); state 1, small and pinhole-like (B, KUVV 66129; E, *T. nepaeolicus* FHSM VP-7262); and state 2, both small and large (C, FHSM VP-3). State 0 is slightly different between *T. proriger* (A-C) and *T. nepaeolicus* (D, E): in *T. proriger* the foramina are shallow and oblong, whereas in *T. nepaeolicus* they are deep and circular. State 2, where both small and large foramina are present, is only seen in *T. proriger*. Note: the photograph of FHSM VP-14840 is inverted to face left.

A

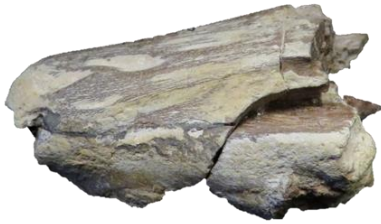

D

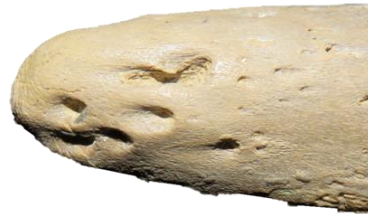

B

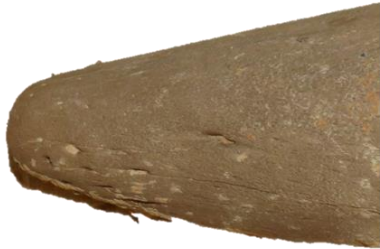

E

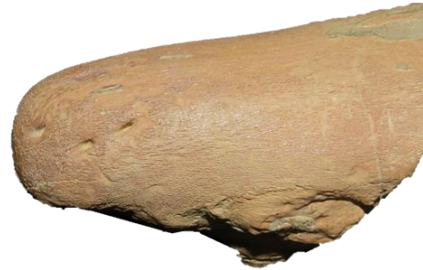

C

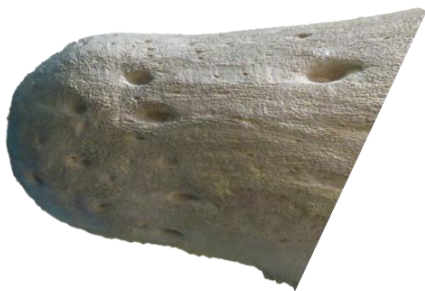

**Examples of character number 7, premaxilla-maxilla suture shape.** (A) State 0, rectangular (*T. proriger* AMNH FARB 4909). (B) State 1, u-shaped (*T. proriger* FHSM VP-3). (C) State 2, m-shaped (*T. proriger* FMNH P15144). Note: the photograph of AMNH FARB 4909 is inverted to face left.

A

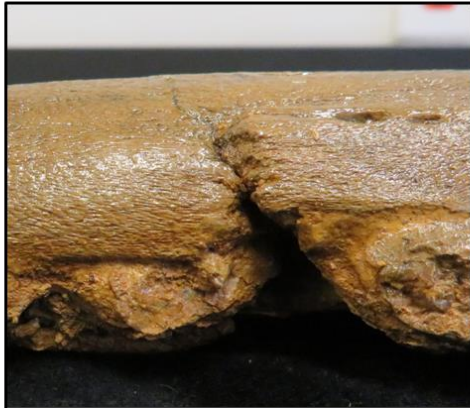

B

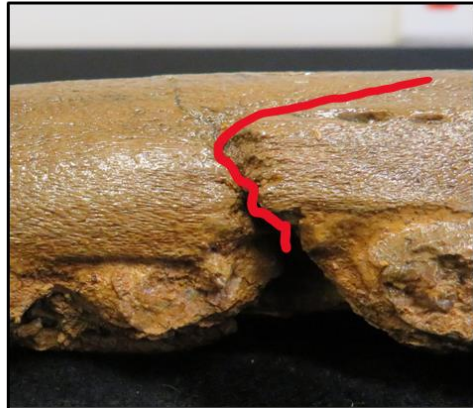

C

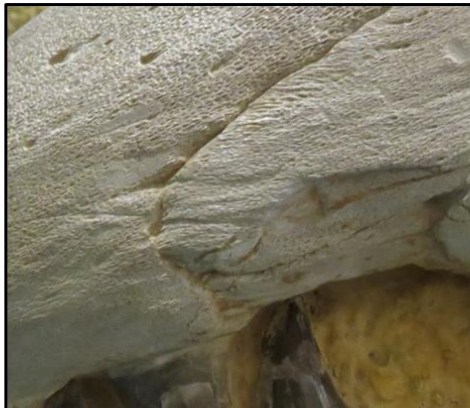

D

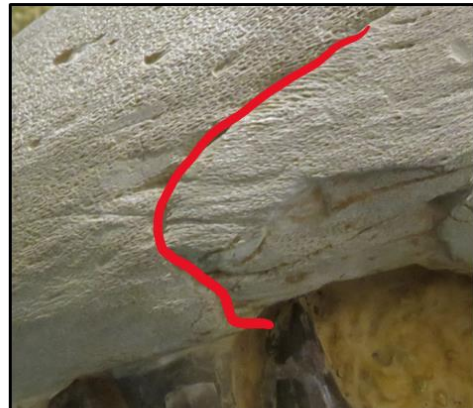

E

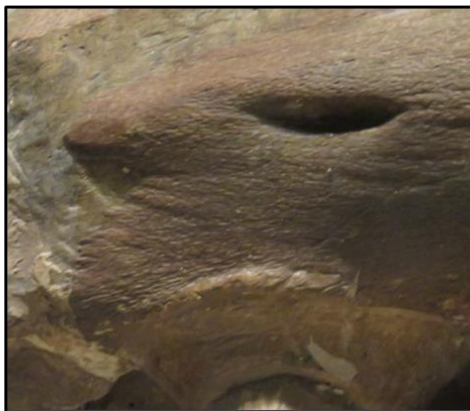

F

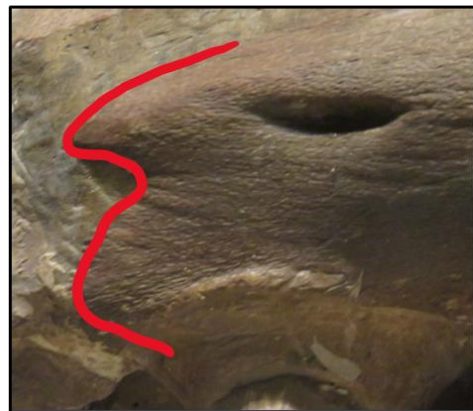

**Examples of character number 5, quadrate suprastapedial process length, lateral view.** State 0, short (A, *T. proriger* FHSM VP-2160; C, *T. nepaeolicus* FHSM VP-9350); state 1, reaches midheight (B, KUVV 66129; D, FHSM VP-14840); and state 2, long (E, *T. nepaeolicus* FHSM VP-7262); the only major difference between *T. proriger* (A, B) and *T. nepaeolicus* (C-E) is that no *T. proriger* specimens have a long suprastapedial process (state 2). Red dashed lines indicate approximately mid-height of the bone. Note: the photographs of FHSM VP-9350 and AMNH FARB 4909 are left quadrates that have been inverted.

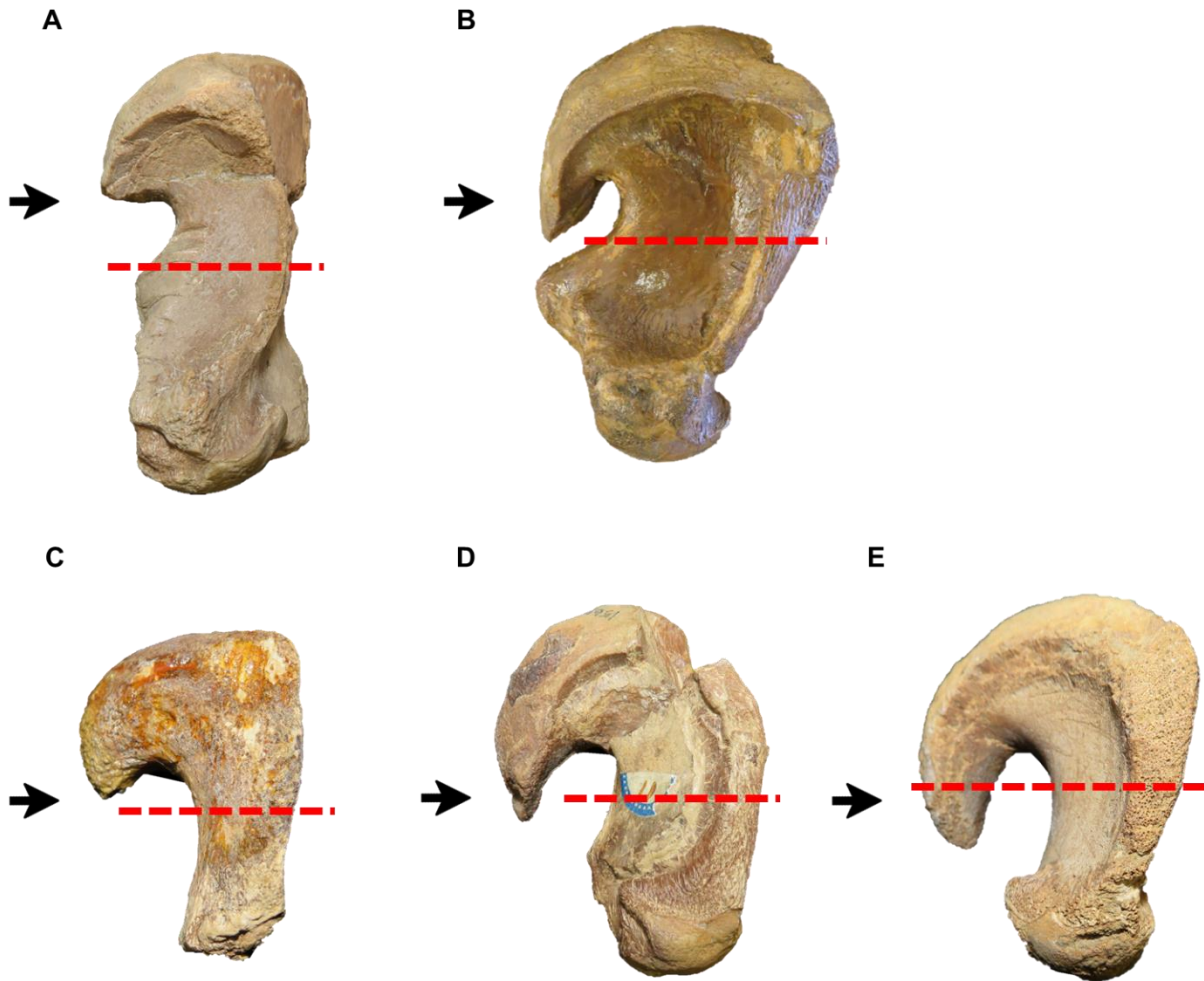

**Examples of character number 12, quadrate suprastapedial process thickness, lateral view.** State 0, slender (A, AMNH FARB 4909; C, AMNH FARB 1565); and state 1, robust (B, AMNH FARB 1555; D, FGM V-43); the main difference between *T. proriger* (A, B) and *T. nepaeolicus* (C, D) is that state 1 is more pronounced in *T. nepaeolicus*. Note: the photographs of AMNH FARB 4909 and AMNH FARB 1555 are left quadrates that have been inverted.

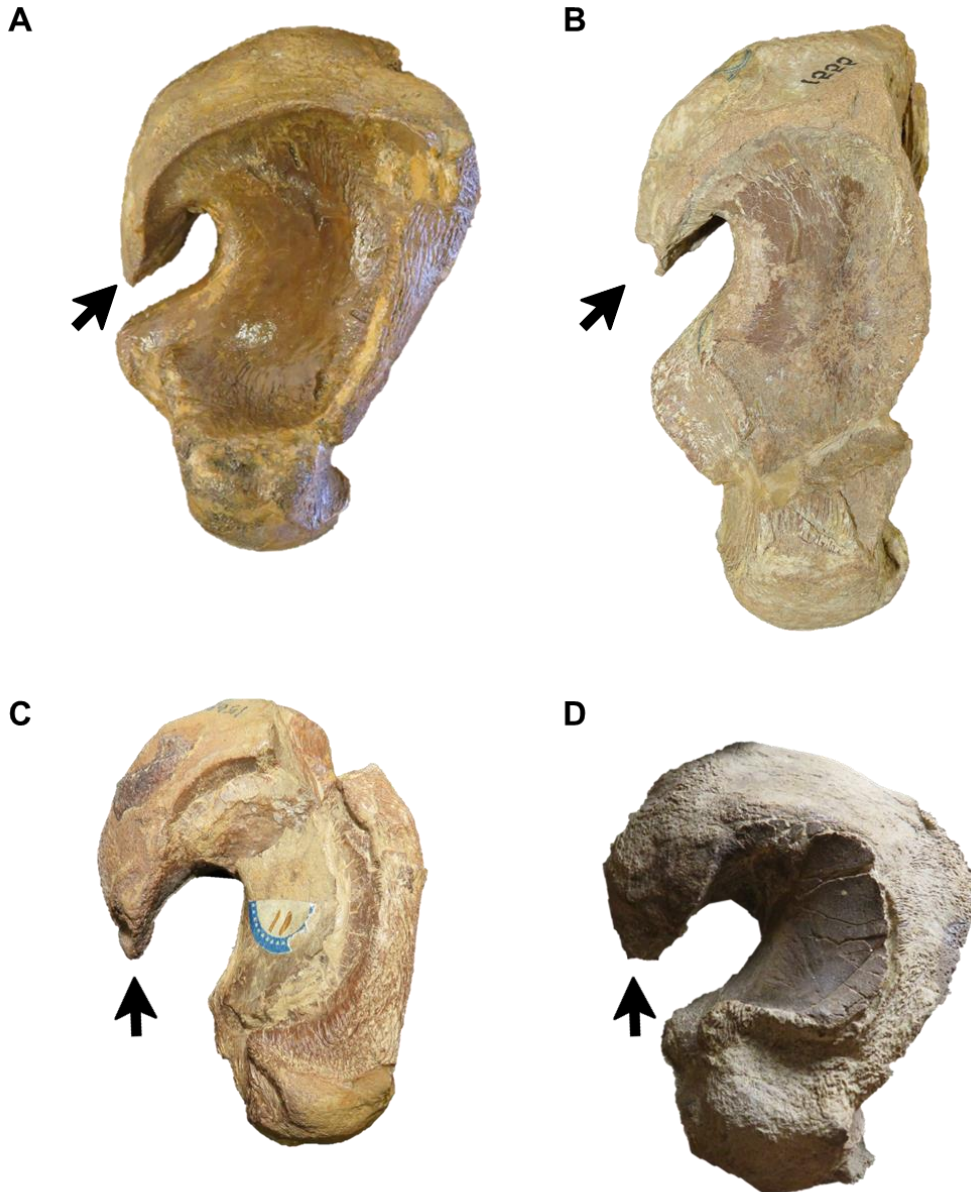

**Examples of character number 13, medial curvature of the quadrate suprastapedial process, posterior view.** (A) State 0, present (*T. nepaeolicus* FHSM VP-9350). (B) State 1, absent (*T. nepaeolicus* AMNH FARB 2167). Red dashed lines indicate the curvature of the suprastapedial process relative to the main body of the quadrate. Note: FHSM VP-9350 was previously identified as *T. kansasensis*.

**A**

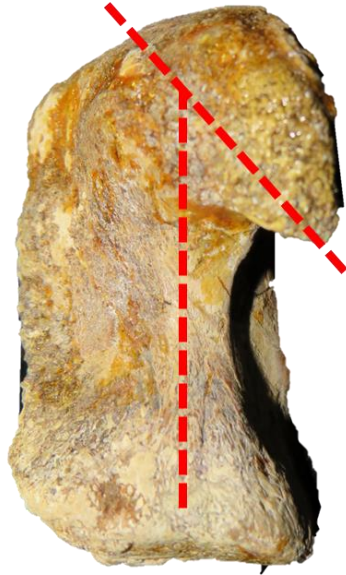

**B**

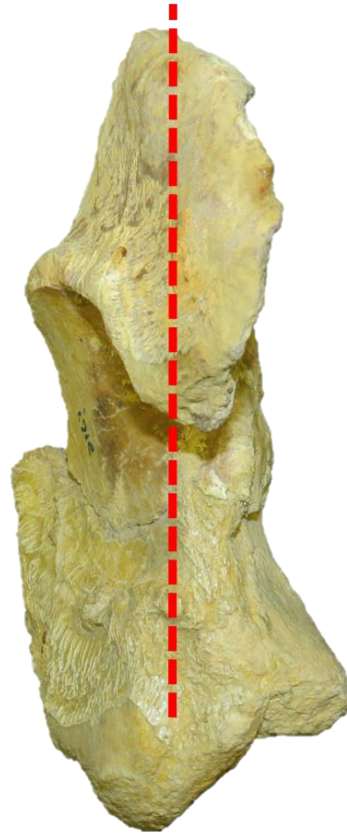

**Examples of character numbers 15 and 16, quadrate infrastapedial process development and shape, lateral view.** In *T. proriger*, (A, FMNH UR902; B, AMNH FARB 1555), the infrastapedial process is always present (character number 15, state 1) and can be either broadly pointed (A; character number 16, state 0) or expanded, rounded, and semicircular (B; character number 16, state 1). In *T. nepaeolicus* (A, FHSM VP-15632; B, AMNH FARB 1565; C, FGM V-43), the infrastapedial process can be absent (C, character number 15, state 0), present and broadly pointed (B, character number 15, state 1 and character number 16, state 0), or present and expanded, rounded, and semicircular (C, character number 15, state 1 and character number 16, state 1). Notes: the photograph of AMNH FARB 1555 is the left quadrate that has been inverted; FHSM VP-15632 and FGM V-43 were previously identified as *T. kansasensis*.

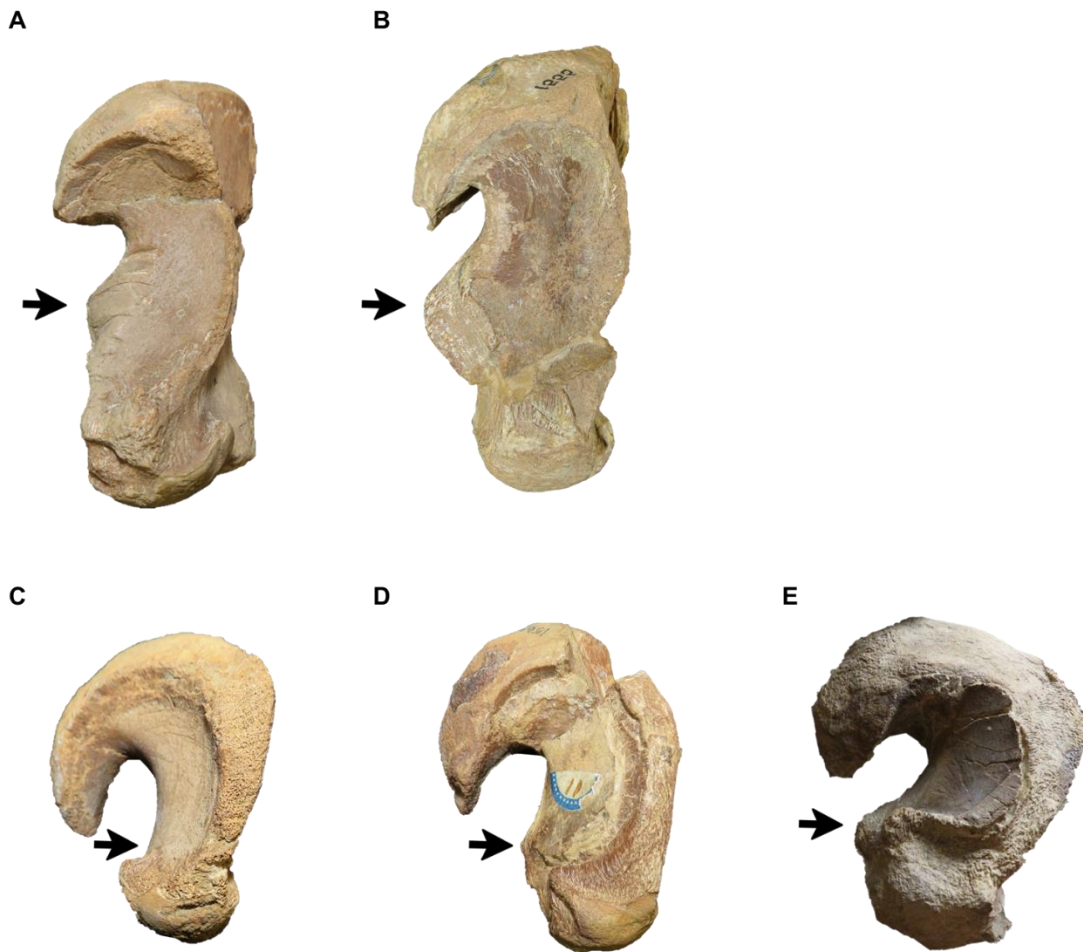

**Examples of character number 20, anteroventral corner of the quadrate tympanic ala, lateral view.** (A) State 0, absent (based on *Mosasaurus hoffmannii* TMM 313-1 (Harrell & Martin, 2015)). (B) State 1, present (based on *Mosasaurus hoffmannii* MNHN AC 9648 (Harrell & Martin, 2015)).

**A**

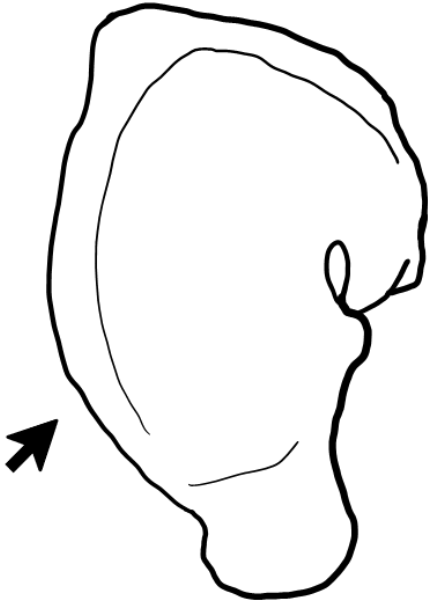

**B**

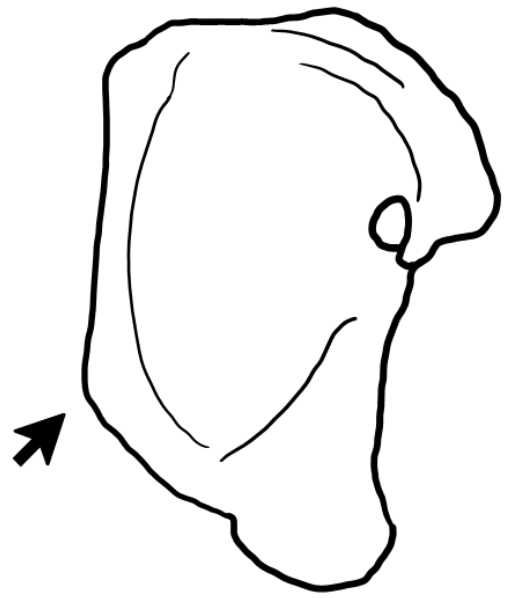



**Examples of character number 26, anterodorsal deflection of the quadrate mandibular condyle, lateral view. (A) State 0, present (*T. proriger* FMNH UR902). (B) State 1, absent, condyle rounded (*T. proriger* AMNH FARB 1555). Note: the photograph of AMNH FARB 1555 is the left quadrate that has been inverted.**

**A**

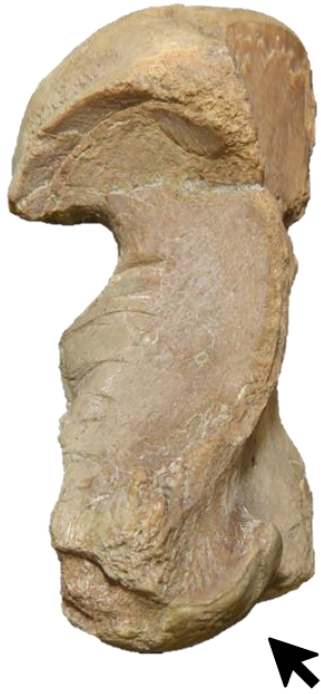

**B**

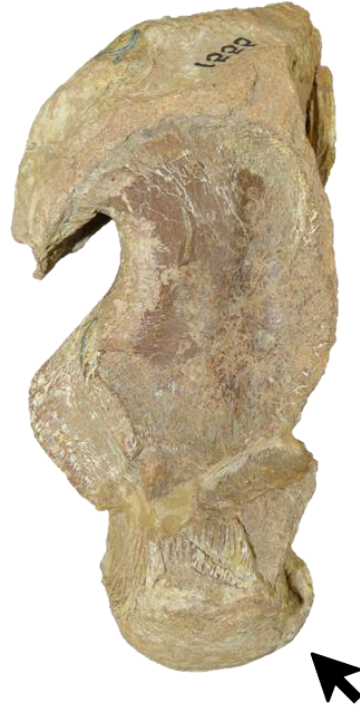

**Examples of character number 28, frontal posterolateral process shape. (A) State 0, slender (*T. proriger* KUVV 28705). State 1, robust (*T. proriger* KUVV 65636).**

**A**

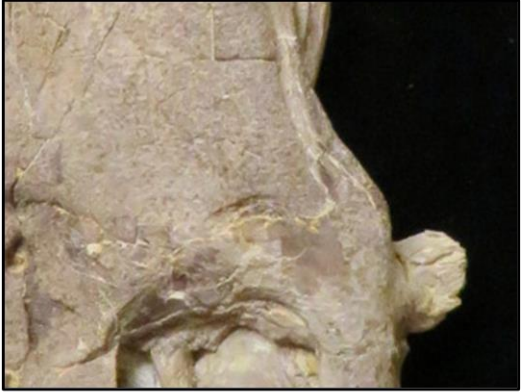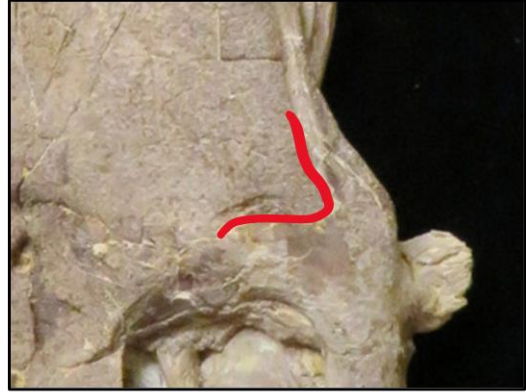

**B**

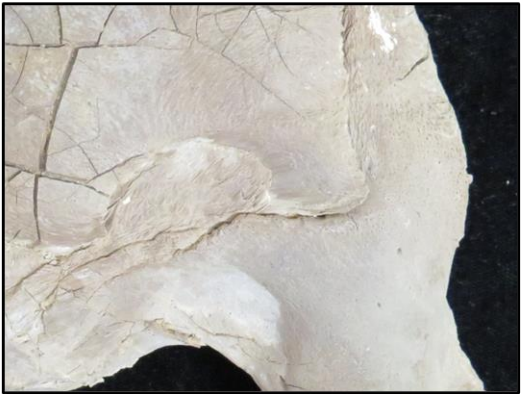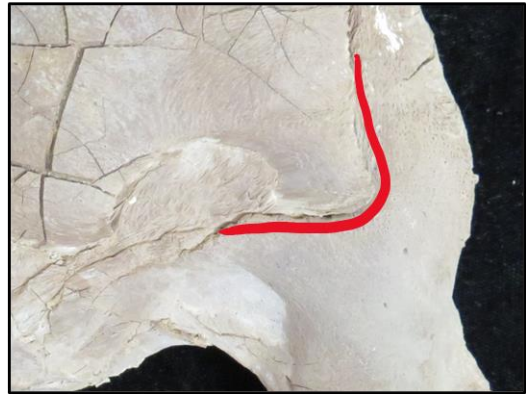

**Examples of character number 32, frontal-parietal medial suture flange size.** State 0, large (**A**, *T. proriger* KUVV 28705; **C**, *T. nepaeolicus* FHSM VP-2295); state 1, small (**B**, *T. proriger* AMNH FARB 4909; **D**, *T. nepaeolicus* FHSM VP-15631). The main difference between *T. proriger* and *T. nepaeolicus* is that state 0 is more pronounced in *T. nepaeolicus*. Note: FHSM VP-2295 and FHSM VP-15631 were previously identified as *T. kansasensis*.

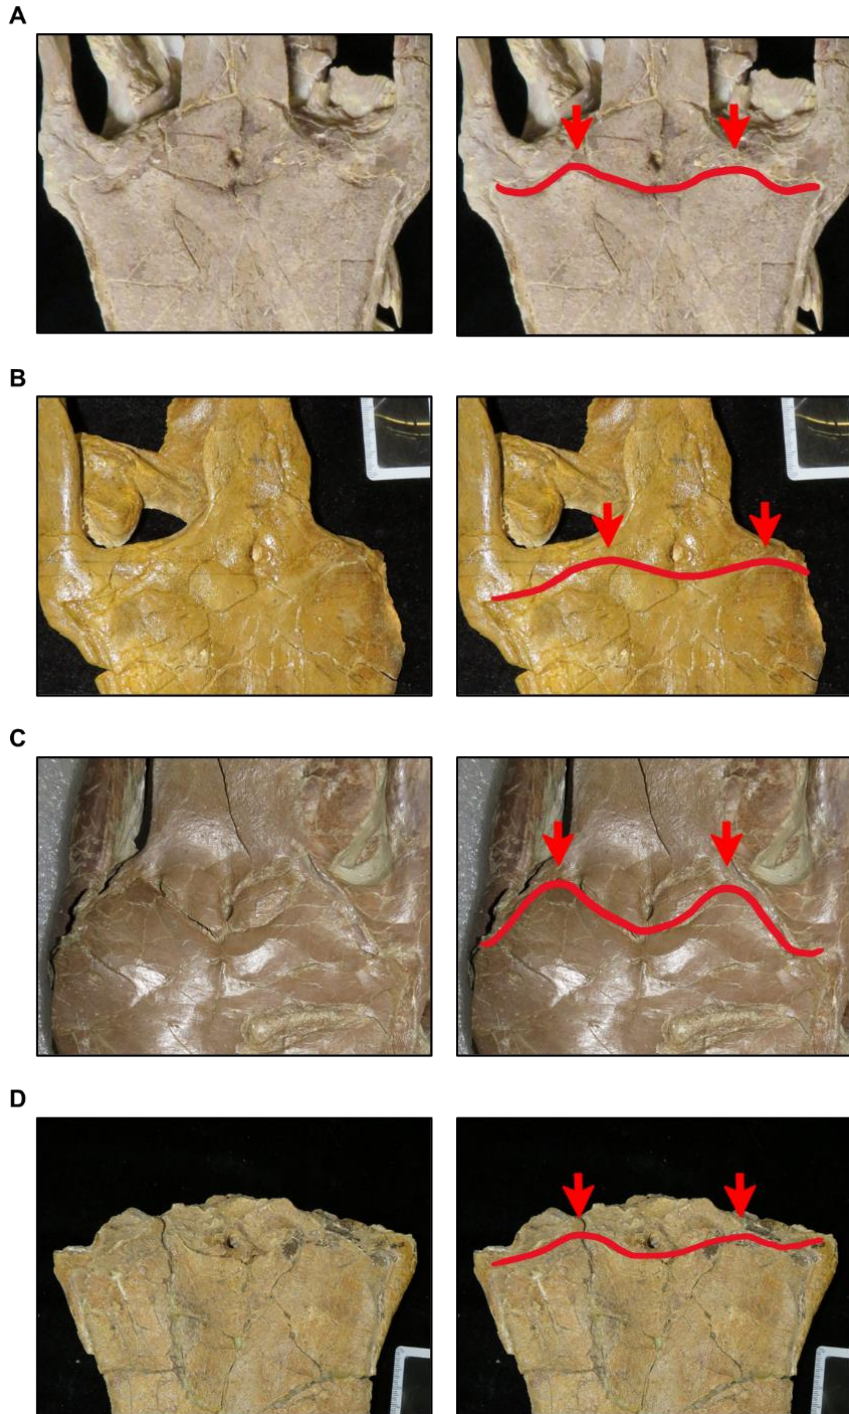

**Examples of character number 35, parietal posterior pegs, dorsal view.** (A) State 0, absent (*T. nepaeolicus* FHSM VP-2209). (B) State 1, present and small (*T. nepaeolicus* FHSM VP-2295). (C) State 2, present and large (based on *Tethysaurus nopcsai* MNHN GOU 2 (Bardet, Suberbiola, & Jalil, 2003)). Note: FHSM VP-2295 was previously identified as *T. kansasensis*.

**A**

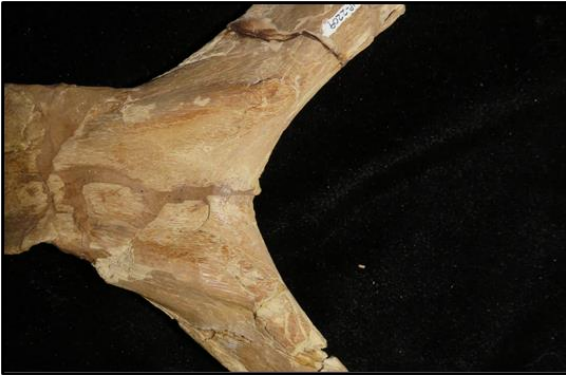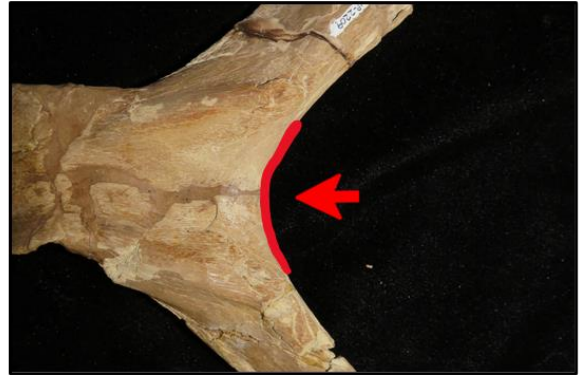

**B**

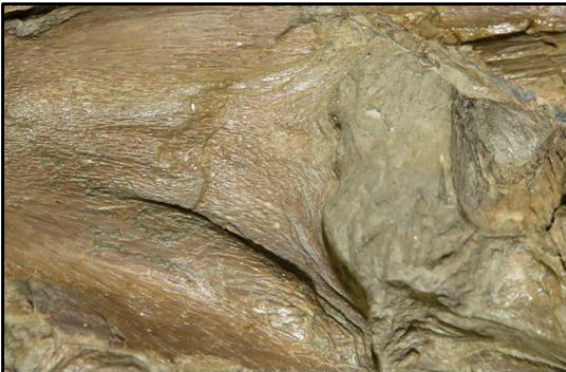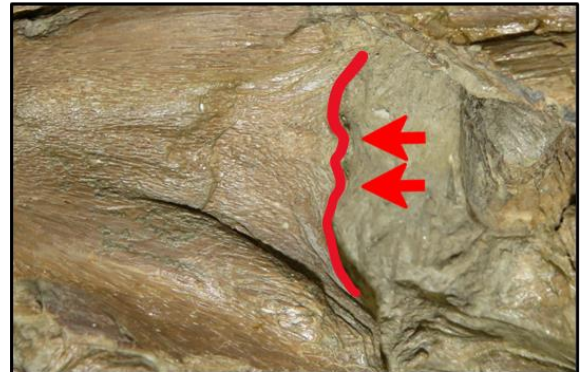

**C**

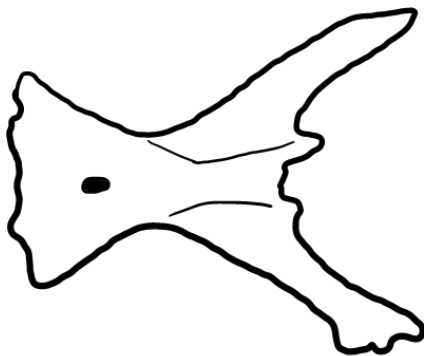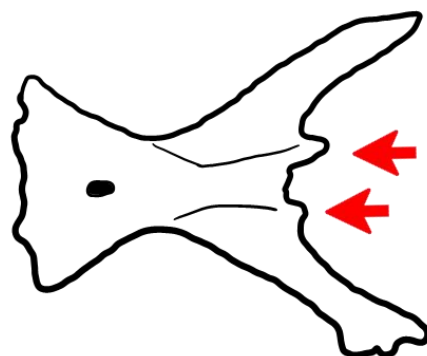

**Examples of character number 37, parietal nuchal fossa, dorsal view. (A) State 0, posterodorsal surface of parietal flat (*T. proriger* FMNH P15144). (B) State 1, fossa present (*T. proriger* AMNH FARB 4909).**

**A**

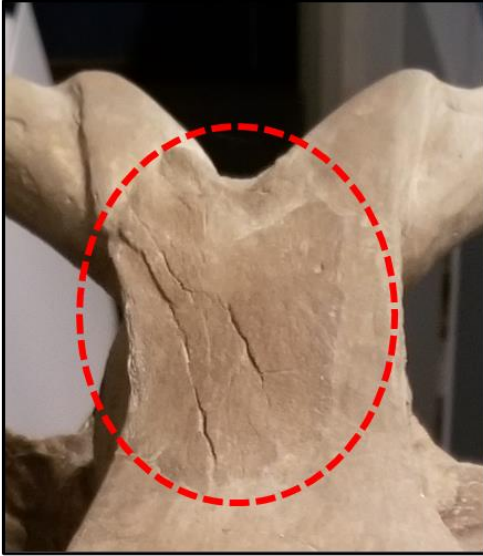

**B**

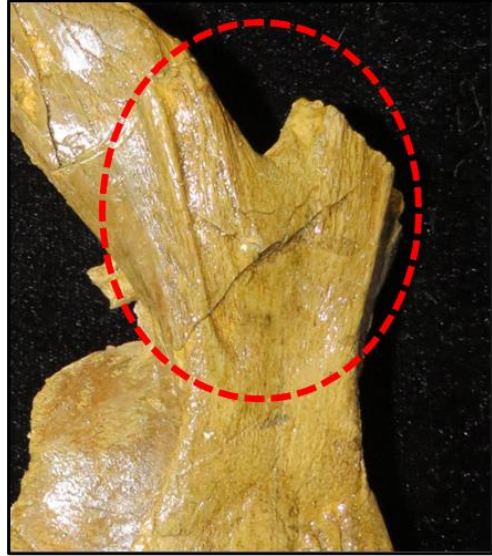

**Examples of character number 38, parietal lateral border shape, dorsal view. (A) State 0, convex (*T. nepaeolicus* FHSM VP-78). (B) State 1, straight (*T. nepaeolicus* FHSM VP-2209). Note: FHSM VP-78 was previously identified as *T. kansasensis*.**

**A**

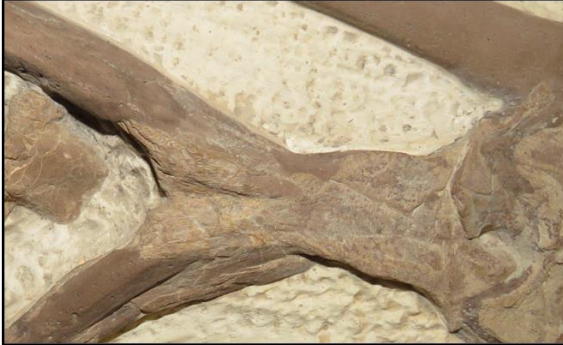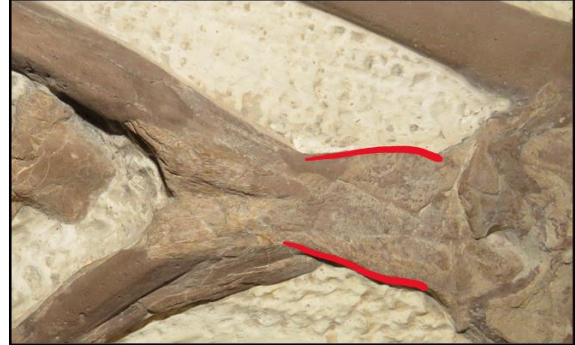

**B**

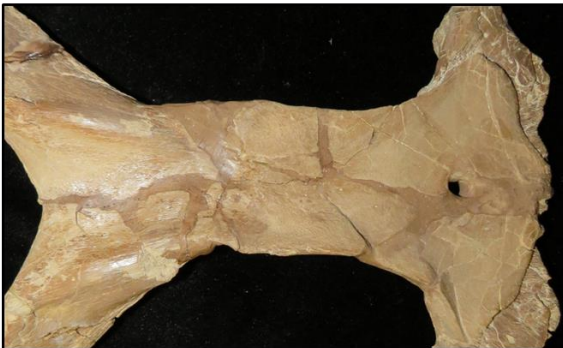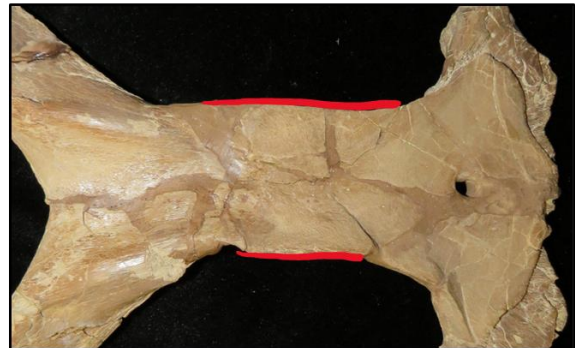

**Examples of character number 40, jugal posteroventral process, lateral view.** (A) State 0, absent (*T. proriger* AMNH FARB 4909). (B) State 1, present (*T. proriger* FHSM VP-3). Note: the photograph of AMNH FARB 4909 is the right jugal that has been inverted.

**A**

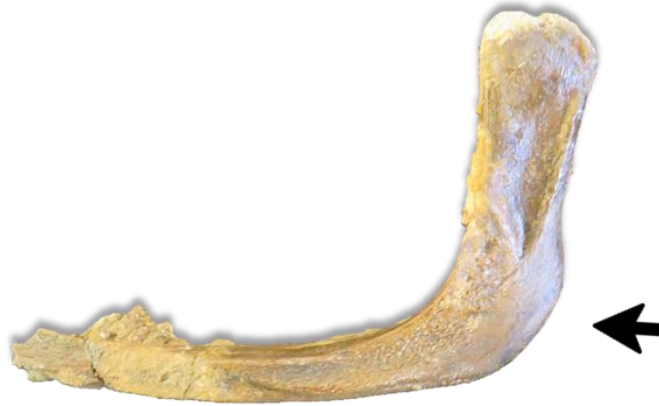

**B**

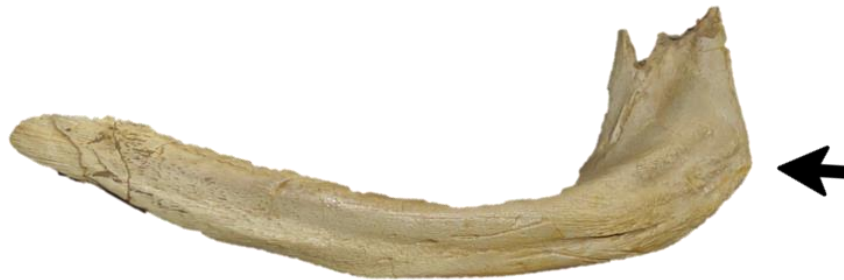

**Examples of character number 45, ectopterygoid process shape, dorsal and ventral (figured here) views. (A) State 0, slender (*T. proriger* AMNH FARB 4909). State 1, robust (*T. proriger* FHSM VP-3).**

**A**

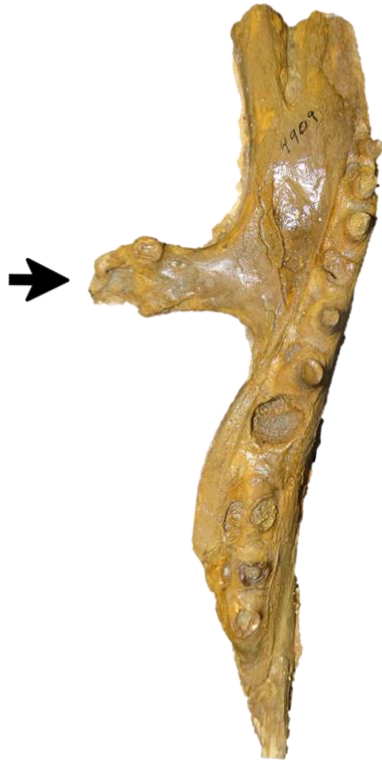

**B**

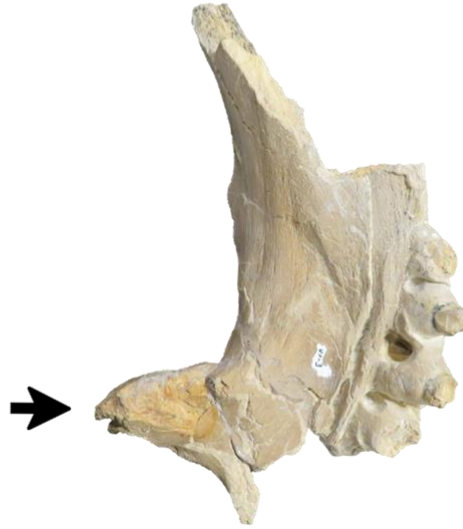



**Examples of character number 50, dorsal ridge of dentary premental process, lateral view.**  
(A) State 0, absent (*T. proriger* AMNH FARB 4909). (B) State 1, present (*T. proriger* FMNH UR820).

**A**

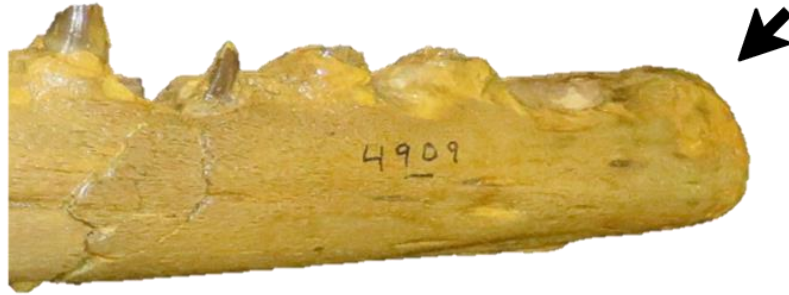

**B**

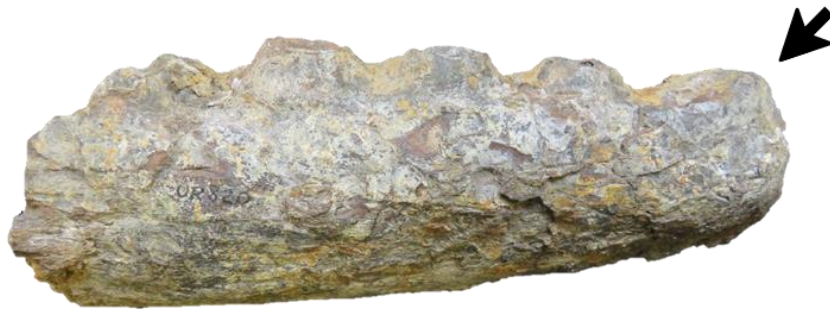

**Examples of character number 57, coronoid anterolateral flange notch, lateral view.** (A) State 0, absent (*T. nepaeolicus* AMNH FARB 1565). (B, C) State 1, notch present and shallow (B, *T. nepaeolicus* FHSM VP-2209; C, based on *Mosasaurus hoffmannii* TMM 11202 (Harrell & Martin, 2015)). (D) State 2, notch present and deeply c-shaped (based on *Mosasaurus hoffmannii* IRSNB R 27 (Harrell & Martin, 2015)).

A

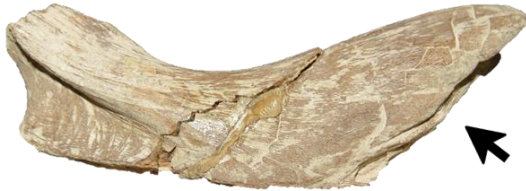

B

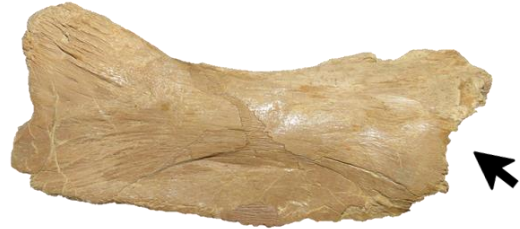

C

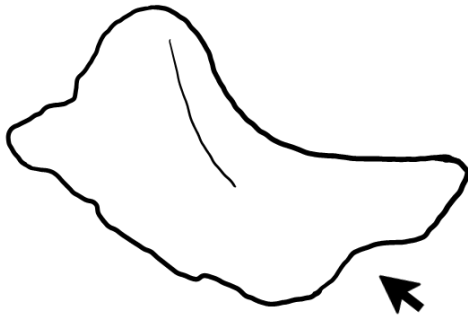

D

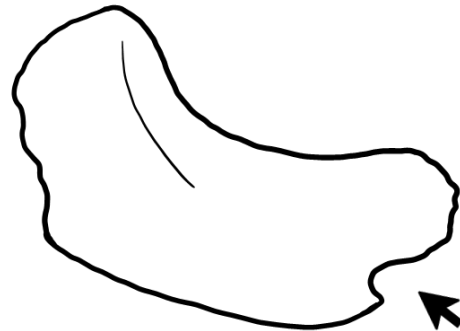

**Examples of character number 58, coronoid posteroventral process, lateral view.** (A) State 0, absent (*Tylosaurus* sp. FHSM VP-14845). (B) State 1, process present as bump (*T. proriger* FHSM VP-3). (C) State 2, process present and fan-like (*T. proriger*, KUVP 5033). Note: the photograph of KUVP 5033 is a right coronoid that has been inverted.

**A**

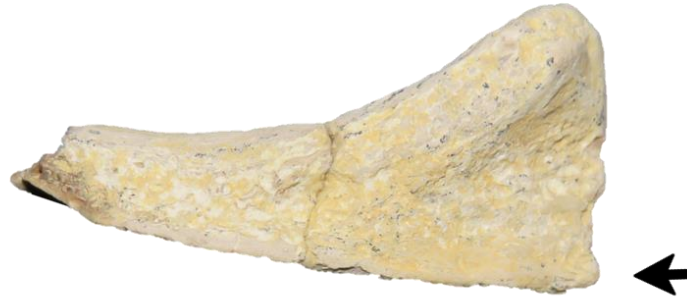

**B**

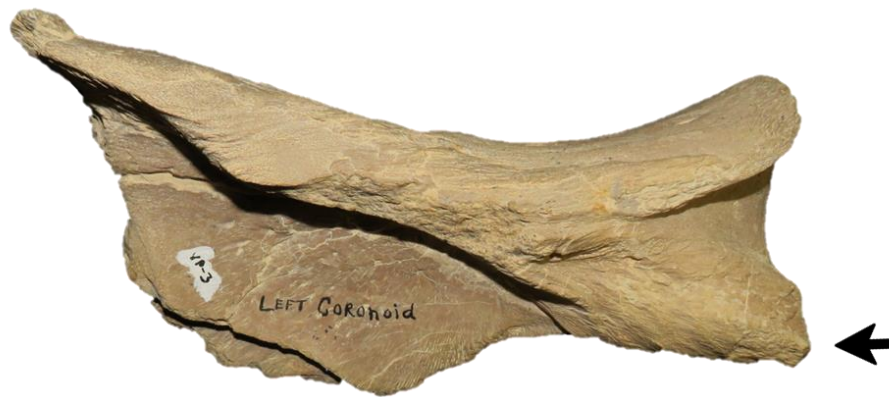

**C**

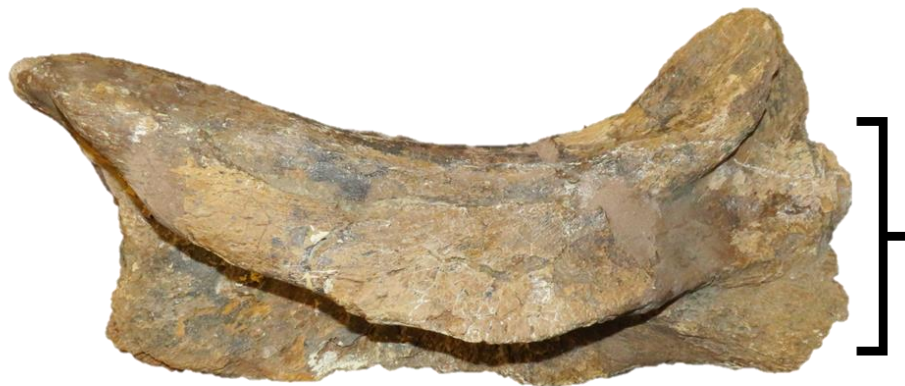

## References

- Bardet N, Suberbiola XP, Jalil NE. 2003. A new mosasauroid (Squamata) from the Late Cretaceous (Turonian) of Morocco. *Comptes Rendus Palevol* 2:607-616.
- Harrell TL, Martin JE. 2015. A mosasaur from the Maastrichtian Fox Hills Formation of the northern Western Interior Seaway of the United States and the synonymy of *Mosasaurus maximus* with *Mosasaurus hoffmanni* (Reptilia: Mosasauridae). *Netherlands Journal of Geosciences* 94:23-37.
